# Supplementary material
Source: PubMed Central journal article supplement (PMC6200923)
Supplement: supp_RA118.003525_137532_1_supp_184210_pddpd7.pdf [file supp_RA118.003525_137532_1_supp_184210_pddpd7.pdf]

## **Supporting information**

### **The tuberous sclerosis complex subunit TBC1D7 is stabilized by Akt phosphorylation-mediated 14-3-3 binding**

James P. Madigan, Feng Hou, Linlei Ye, Jicheng Hu, Aiping Dong, Wolfram Tempel, Marielle E. Yohe, Paul A. Randazzo, Lisa M. Miller Jenkins, Michael M. Gottesman, Yufeng Tong

#### **Table S1. Crystallography data and refinement statistics**

**Figures S1, S2, S3**

**Table S1. Crystallography data and refinement statistics**

|                                                         |                                                 |                                                 |
|---------------------------------------------------------|-------------------------------------------------|-------------------------------------------------|
|                                                         | 14-3-3 zeta / peptide                           | TBC1D7                                          |
| <b>PDB Code</b>                                         | 5ULO                                            | 3QWL                                            |
| <b>Data collection</b>                                  |                                                 |                                                 |
| Space group                                             | <i>P2<sub>1</sub>2<sub>1</sub>2<sub>1</sub></i> | <i>P2<sub>1</sub>2<sub>1</sub>2<sub>1</sub></i> |
| Cell dimensions                                         |                                                 |                                                 |
| <i>a</i> , <i>b</i> , <i>c</i> (Å)                      | 69.7, 71.6, 129.9                               | 34.6, 84.0, 87.7                                |
| $\alpha$ , $\beta$ , $\gamma$ (°)                       | 90.0, 90.0, 90.0                                | 90.0, 90.0, 90.0                                |
| Resolution (Å)                                          | 50.00–2.14 (2.18–2.14)*                         | 40.00–1.90 (1.97–1.90)                          |
| <i>R</i> <sub>merge</sub> (%)                           | 5.9 (97.9)                                      | 6.6 (85.5)                                      |
| average <i>I</i> /average error <sup>a</sup>            | 53.9 (2.4)                                      | 41.3 (2.1)                                      |
| Completeness (%)                                        | 99.5 (100.0)                                    | 99.7 (100.0)                                    |
| Redundancy                                              | 8.0 (8.2)                                       | 7.0 (7.1)                                       |
| <b>Refinement</b>                                       |                                                 |                                                 |
| Resolution (Å)                                          | 29.9–2.14                                       | 27.15–1.90                                      |
| No. reflections work/free                               | 35290/1101                                      | 19653/1062                                      |
| <i>R</i> <sub>work</sub> / <i>R</i> <sub>free</sub> (%) | 22.7/27.0                                       | 21.1/25.8                                       |
| No. atoms                                               |                                                 |                                                 |
| Protein                                                 | 3549                                            | 2147 <sup>c</sup>                               |
| Peptide                                                 | 88                                              |                                                 |
| Water                                                   | 60                                              | 44 <sup>c</sup>                                 |
| B-factors (Å <sup>2</sup> )                             |                                                 |                                                 |
| Protein                                                 | 77.0 <sup>b</sup>                               | 39.1 <sup>c</sup>                               |
| Peptide                                                 | 92.6 <sup>b</sup>                               |                                                 |
| Water                                                   | 68.9 <sup>b</sup>                               | 39.7 <sup>c</sup>                               |
| RMSD                                                    |                                                 |                                                 |
| Bond lengths (Å)                                        | 0.010                                           | 0.014                                           |
| Bond angles (°)                                         | 0.98                                            | 1.3                                             |
| Molprobitry $\phi$ - $\psi$ plot % residues             |                                                 |                                                 |
| favored                                                 | 98.9                                            | 98.5                                            |
| outliers                                                | 0.0                                             | 0.0                                             |

\*values in parentheses are for highest resolution shell unless otherwise indicated.

<sup>a</sup> SCALEPACK reports “Average I” and “Average error”

<sup>b</sup> GJ Kleywegt: Moleman software

<sup>c</sup> PHENIX.PDBTOOLS [Adams PD, Afonine PV, Bunkóczi G, Chen VB, Davis IW, Echols N, Headd JJ, Hung LW, Kapral GJ, Grosse-Kunstleve RW, McCoy AJ, Moriarty NW, Oeffner R, Read RJ, Richardson DC, Richardson JS, Terwilliger TC, Zwart PH (2010) PHENIX: a comprehensive Python-based system for macromolecular structure solution. *Acta Crystallogr D Biol Crystallogr.* **66**(Pt 2): 213-221.]

**Figure S1. Structure-based alignment of TBC domains of all known TBC structures.** The same pdb codes as those in Fig. 1C were used for the alignment. The Gyp1 has an insertion of 57 unstructured residues between a.a. 510 and 568 that are invisible in the crystal structure (PDB:2G77). This insertion does not exist in other TBC domains and was removed from the alignment. The numbering of the helices was based on that of Gyp1. Helix 5 is missing in TBC1D7 and is colored red.

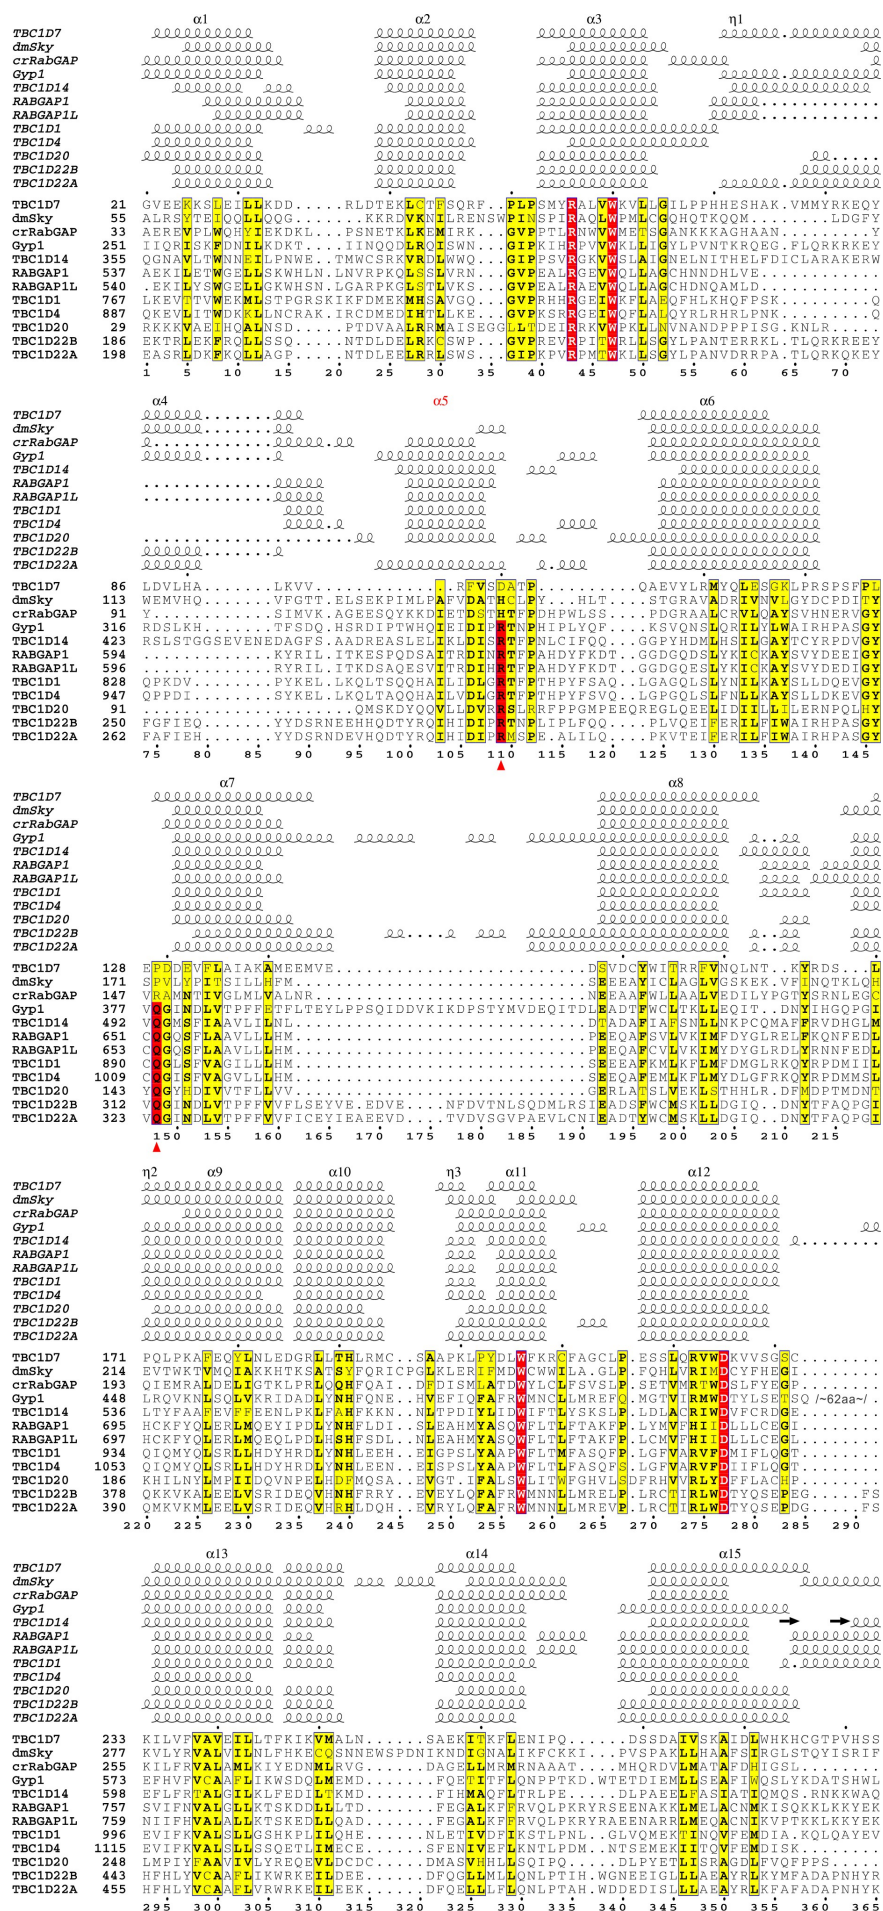

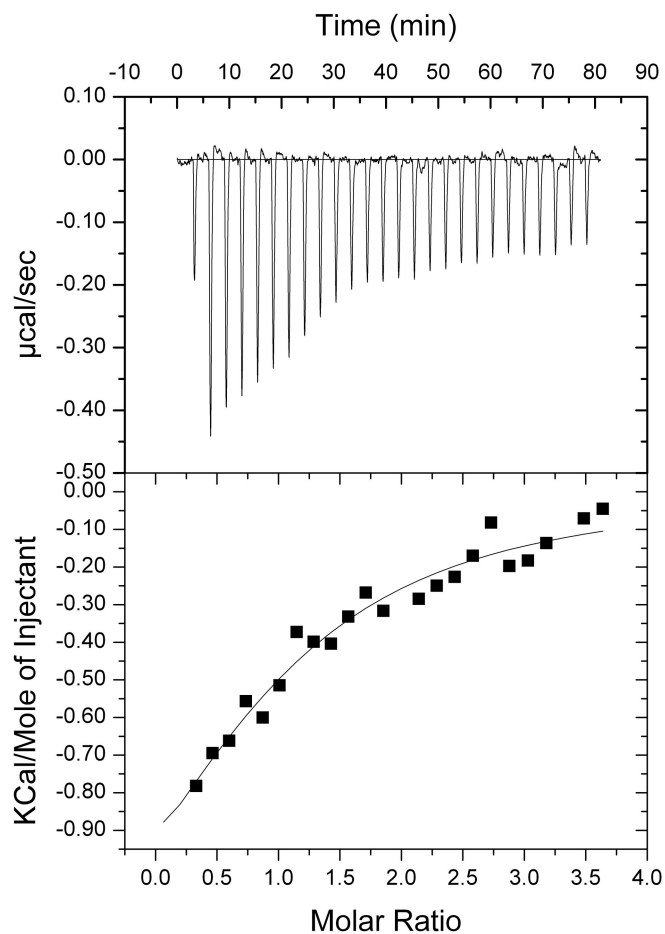

**Figure S2. Isothermal titration calorimetry measurement of 14-3-3 zeta and TBC1D7 phosphopeptide binding.** 12-mer TBC1D7 phosphopeptide at 1 mM in a syringe was titrated into 52 µM 14-3-3 protein in a sample cell. One-site binding fitting gives a dissociation constant  $K_D = 58.5 \mu\text{M}$

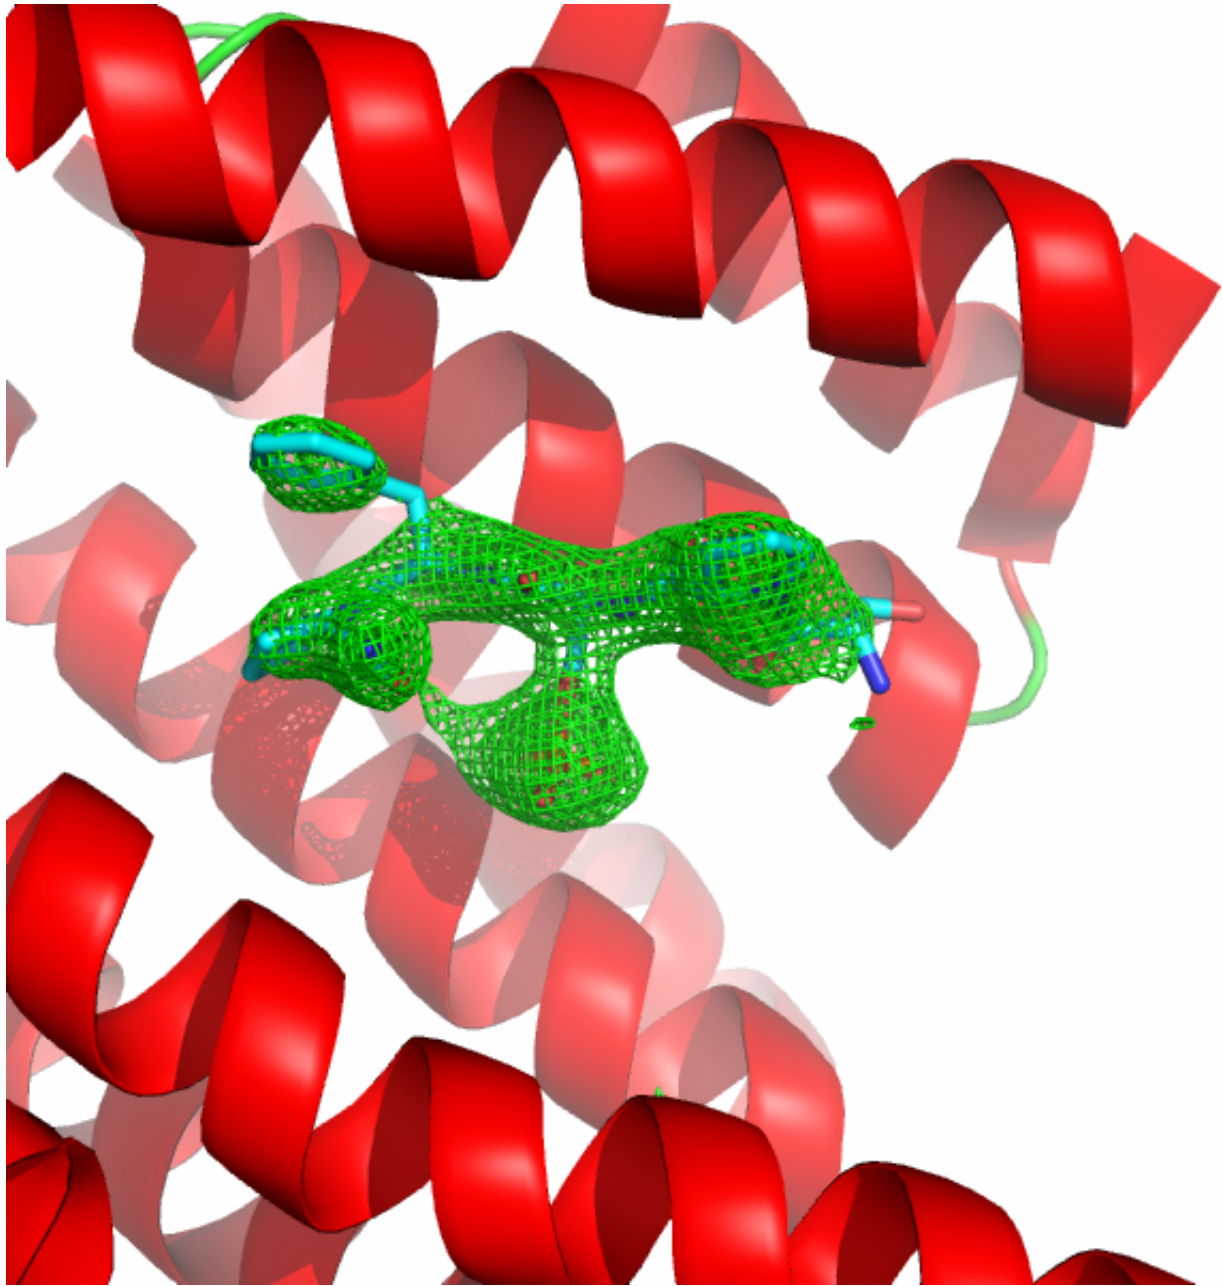

**Figure S3. Omit map of the TBC1D7 peptide in the complex structure.** The omit Fo-Fc electron density map for the peptide was contoured at 4  $\sigma$ .
